# Supplementary material
Source: Springer Nature journal article supplement (https://www.springermedizin.de/resource/supplementary/12935_2012_345_MOESM11_ESM.pdf/9540332)

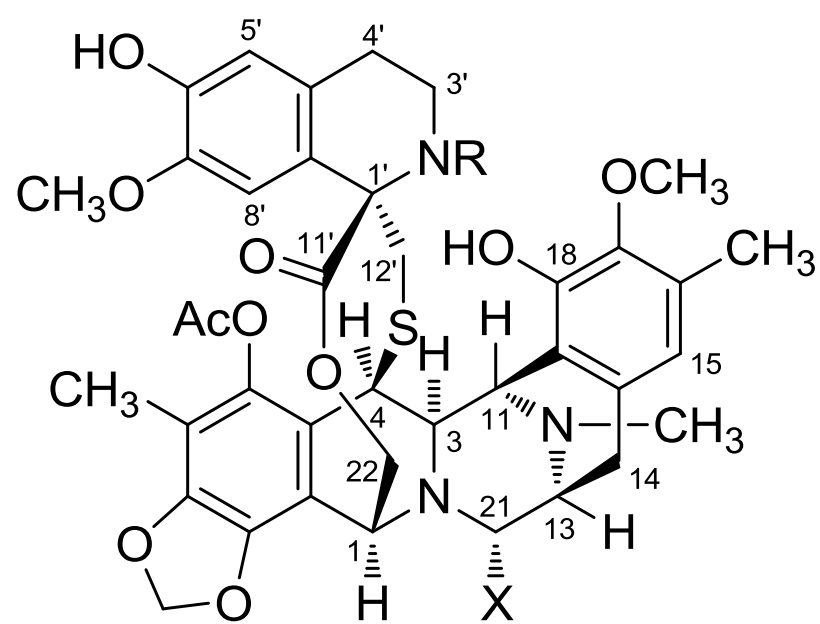

ecteinascidins (Ets)

770: R = H, X = CN (**1a**)

743: R = H, X = OH (**1b**)

compound **3**

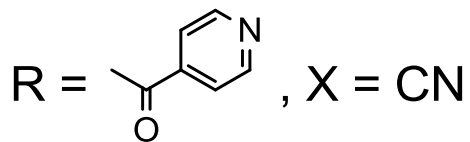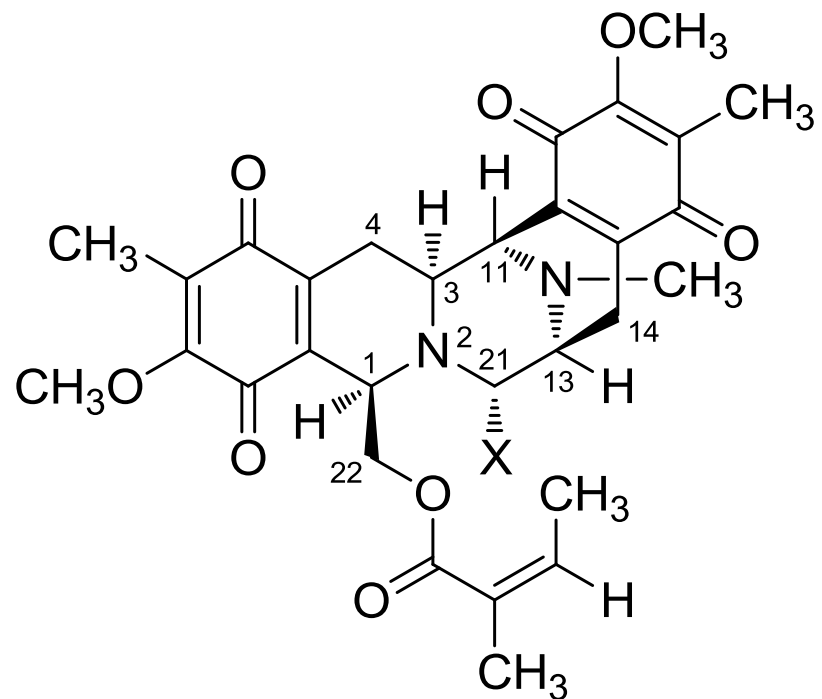

renieramycins

M: X = CN (**2a**)

E: X = OH (**2b**)

Supplement: MOESM11 [file 9540332]
